# Supplementary material
Source: PubMed Central journal article supplement (PMC3567254)
Supplement: NIHMS415278-supplement-Supplemental_Fig__3.pdf [file NIHMS415278-supplement-Supplemental_Fig__3.pdf]

A

|       |     |                                                               |
|-------|-----|---------------------------------------------------------------|
| mCsk  | 188 | WALNMKELKLLQTIQKGEFGDVMLGDYRGNKVAVKCIKN--DATAQAF LAEASVMTQLRH |
| MbCsk | 187 | HVIEPKDLIKGAKLGSQFGDVEEGTYCGQRVAIKTLKKNYEQSLRDEF LAEASVMTKLKH |
| CoCsk | 241 | WEIQRSEVILGNILGSGNFGEVYEATWRSQKVAVKTLKG--ENAMEDFLAEASVMTRLRH  |
|       |     |                                                               |
| mCsk  | 246 | SNLVQLLGVIVEEKGGLYIVTEYMAKGSIVDYLRSRGRSVLGGDCLLKFSLDVCEAMEYLL |
| MbCsk | 247 | PNLVKLEGVVTEGKE-TMLVTEYMAKGNLLDFLRSRGRSVVKKDLLFKFTQDICEGMAFL  |
| CoCsk | 299 | KNLVQLLGVCLDITP-IYIITEFMSKGSLODYLRSRGRREIPMATLFSFAQQVSSAMVYL  |
|       |     |                                                               |
| mCsk  | 306 | EGNNFVHRDLAARNVLVSEDNVAKVSDFGLTKEAS-S-TQDTGKLPVKWTAPEALREKKF  |
| MbCsk | 306 | EKQNVVHRDLAARNVLISEEDVAKVADFG LAKRSD-WGDIDSGKLPVKWTAPEVLKHKVS |
| CoCsk | 358 | ESRNFVHRDLAARNVLVGDNDTAKVADFG LAKNANEQDVVEGGKIPIKWTAPEALLNNTY |
|       |     |                                                               |
| mCsk  | 364 | STKSDVWSFGILLWEIYSFGRVPYPRIPKDVVPRVEKGYKMDAPDGCPPAVY-EVMKNC   |
| MbCsk | 365 | TSKSDVWSFGITMWEIYSYGRSPYPRMSQKDVVDALPKGYRMERPDDCPETLYTAVMRAC  |
| CoCsk | 418 | TNKSDVWSFGVVLWEVYSFGRIPYPRMSHTEVVQEIKRGYRMESPEGCPTAIY-NIMLAC  |
|       |     |                                                               |
| mCsk  | 423 | WHLDAAMRPSFLQLREQLEHIKTHELHL                                  |
| MbCsk | 425 | WEMDPLSRPTFNRLKRTLAKFKGS----                                  |
| CoCsk | 477 | WQIEVDRRPSFREIETOLEKAAGTAM--                                  |

B

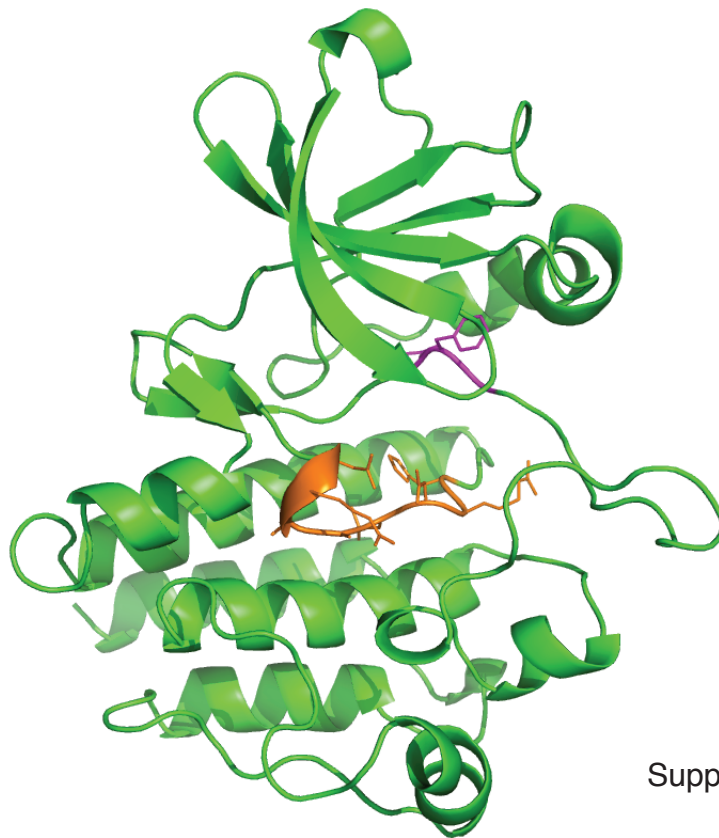

Supplemental Figure 3
