# Supplementary material
Source: PubMed Central journal article supplement (PMC3567254)

Elution profile of peptide

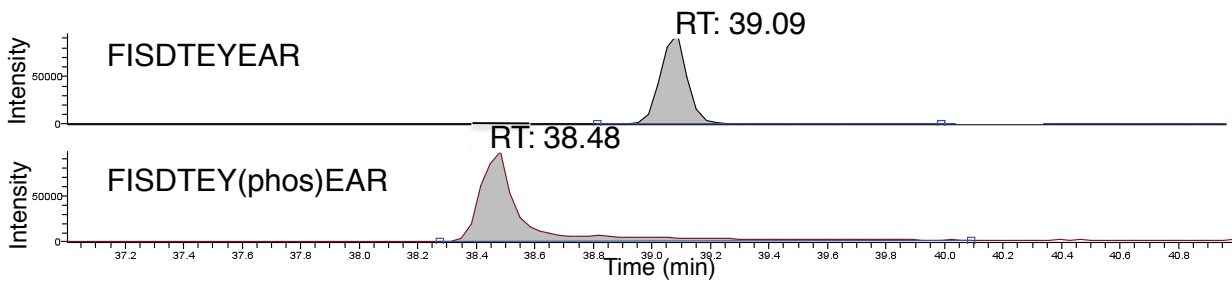

Peptide fragmentation

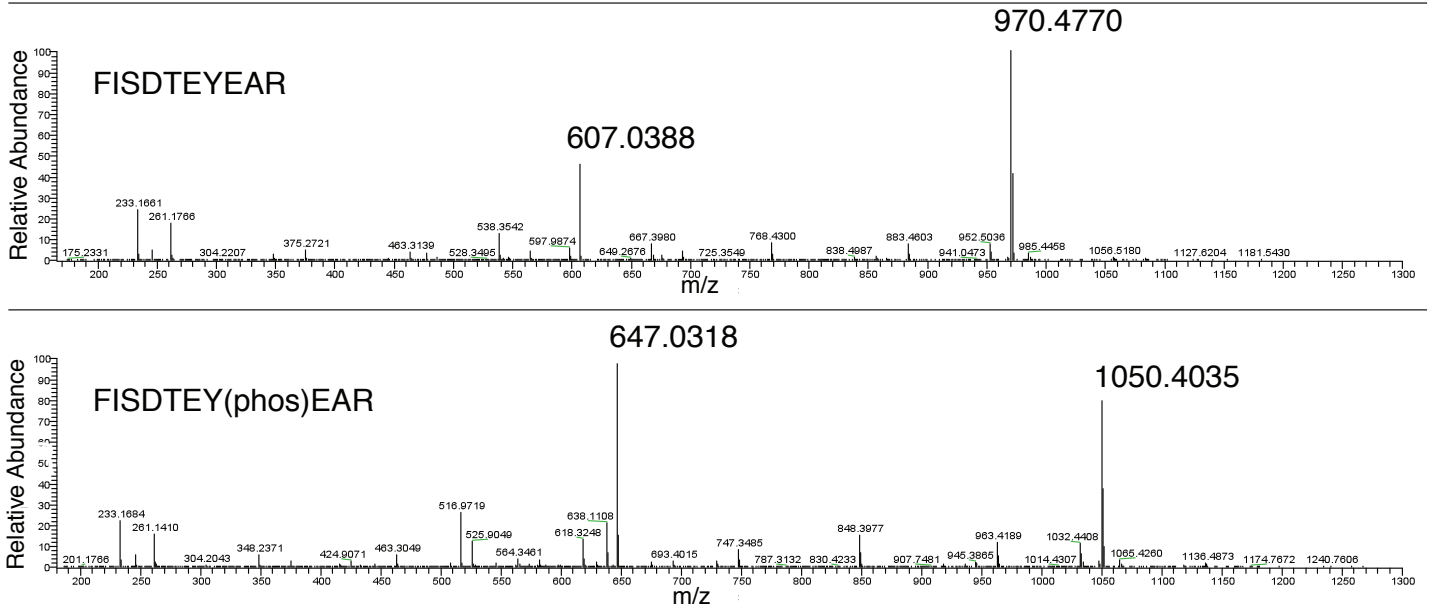

Supplemental Figure 1

Supplement: NIHMS415278-supplement-Supplemental_Fig__1.pdf [file NIHMS415278-supplement-Supplemental_Fig__1.pdf]

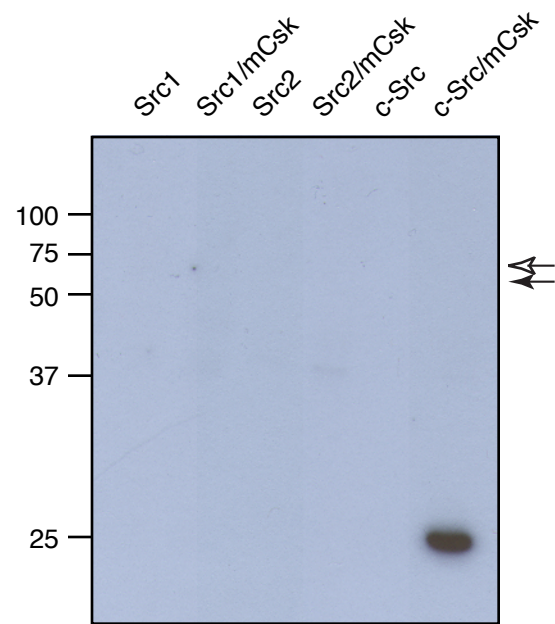

Figure S2

Supplement: NIHMS415278-supplement-Supplemental_Fig__2.pdf [file NIHMS415278-supplement-Supplemental_Fig__2.pdf]
